# Supplementary material for: Preparation and Characterization of Magnetite Talc (Fe3O4@Talc) Nanocomposite as an Effective Adsorbent for Cr(VI) and Alizarin Red S Dye
Source: MDPI journal article supplement (doi:10.3390/ma15093401), 2022-05-09
Supplement: s1 [file s1]

# Preparation and Characterization of Magnetite Talc (Fe<sub>3</sub>O<sub>4</sub>@Talc) Nanocomposite as an Effective Adsorbent for Cr(VI) and Alizarin Red S Dye

AbdElAziz A. Nayl <sup>1,\*</sup>, Ahmed I. Abd-Elhamid <sup>2</sup>, Ismail M. Ahmed <sup>1</sup> and Stefan Bräse <sup>3,4,\*</sup>

<sup>1</sup> Department of Chemistry, College of Science, Jouf University, Sakaka 72341, Al Jouf, Saudi Arabia; aanayel@ju.edu.sa or aanayl@yahoo.com (A.A.N.); ismadwy@yahoo.ca (I.M.A.)

<sup>2</sup> Nanotechnology and Composite Materials Research Department, Advanced Technology and New Materials Research Institute (ATNMRI), City of Scientific Research and Technological Applications (SRTA-City), New Borg Al-Arab, Alexandria 21934, Egypt; ahm\_ch\_ibr@yahoo.com

<sup>3</sup> Institute of Organic Chemistry (IOC), Karlsruhe Institute of Technology (KIT), Fritz-Haber-Weg 6, 76133 Karlsruhe, Germany

<sup>4</sup> Institute of Biological and Chemical Systems—Functional Molecular Systems (IBCS-FMS), Director Hermann-von-Helmholtz-Platz 1, D-76344 Eggenstein-Leopoldshafen, Germany

\* Correspondence: aanayel@ju.edu.sa or aanayl@yahoo.com (A.A.N.); stefan.braese@kit.edu (S.B.)

In *Langmuir isotherm model*, the linear form is represented by the following equation:

$$\frac{1}{q_e} = \frac{1}{Q_{\max}} + \frac{1}{bQ_{\max}} \left( \frac{1}{C_e} \right) \quad (S1)$$

where,  $q_e$  is the amounts of Cr(VI) ions and (ARS)-dye per unit mass of Fe<sub>3</sub>O<sub>4</sub>@Talc nanocomposite (mgg<sup>-1</sup>),  $C_e$  is the Cr(VI) ions and (ARS)-dye concentrations at equilibrium (mgL<sup>-1</sup>), and  $Q_{\max}$  and  $b$  are Langmuir constants related to the sorption capacities and binding energies between the sorbent with the sorbate, respectively.

One of the essential characteristics of Langmuir isotherm is a dimensionless constant that is called separation factor or equilibrium parameter  $R_L$  and can be estimated by the following equation;

$$R_L = \frac{1}{1 + bC_o} \quad (S2)$$

The value of separation factor  $R_L$  indicates either the adsorption isotherm to be unfavorable ( $R_L > 1$ ), favorable ( $0 < R_L < 1$ ), irreversible ( $R_L = 0$ ) or linear ( $R_L = 1$ ).

*The Freundlich model* is an empirical equation used to describe the sorption occurred on heterogeneous surfaces. The linear equation is commonly demonstrated as:

$$\log q_e = \log K_f + (1/n) \log C_e \quad (S3)$$

where,  $q_e$  (mgg<sup>-1</sup>) and  $C_e$  (mgL<sup>-1</sup>) are the amounts of Adsorbate per unit mass of Fe<sub>3</sub>O<sub>4</sub>@Talc nanocomposite and Adsorbate concentrations at equilibrium, respectively.  $K_f$  and  $1/n$  are the Freundlich model constants that indicate to the sorption capacities and the sorption intensities, respectively.

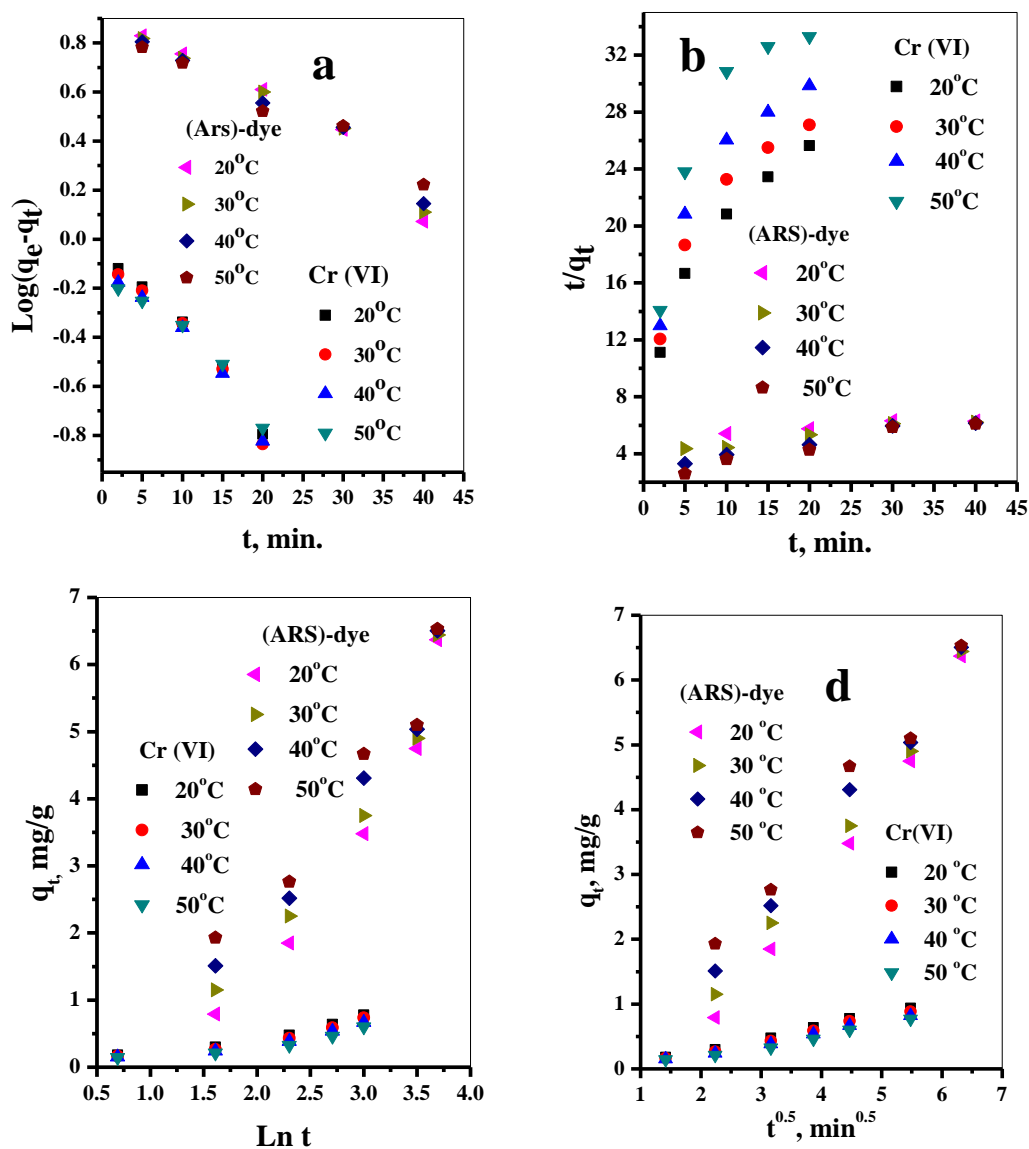

**Figure S1.** The kinetic models of adsorption for adsorption of both Cr(VI) and (ARS)-dye onto 0.05g/10mL Fe<sub>3</sub>O<sub>4</sub>@Talc nanocomposite, (a) Pseudo-first order, (b) and Pseudo-second order, (c) Elovich model, and (d) intraparticle diffusion.

([Cr(VI)]= 10 mg/L, pH= 3, T = 20 °C; ([ARS-dye]= 50 mg/L, pH= 2, T = 20 °C).
